# Supplementary material for: SLC2As as diagnostic markers and therapeutic targets in LUAD patients through bioinformatic analysis
Source: Front Pharmacol. 2022 Nov 28;13:1045179. doi: 10.3389/fphar.2022.1045179 (PMC9742449; doi:10.3389/fphar.2022.1045179)
Supplement: Supplementary file 2 [file DataSheet3.xlsx]

## Sheet: Sheet1
Supplementary material S4:The relevance analysis of SLC2As and related genes of immune cells in TIMER database
Immune cell	Gene markers	Purity		Purity		Purity		Purity		Purity		Purity		Purity		Purity		Purity		Purity					Purity			Purity			Purity		Purity
		SLC2A1		SLC2A2		SLC2A3		SLC2A4		SLC2A5		SLC2A6		SLC2A7		SLC2A8		SLC2A9		SLC2A10					SLC2A11			SLC2A12			SLC2A13		SLC2A14
		cor	P	cor	P	cor	p					Cor	P			R	P
CD8	CD8A											0.361	1.2e-16			0.11	0.0144	0.2	7.8e-06						-0.199	8.29e-06
	CD8B											0.354	5.51e-16			0.112	0.0127	0.196	1.21e-05						-0.202	6.13e-06
T CELL	CD3D					0.122	0.00668			0.279	2.8e-10	0.356	3.73e-16					0.205	4.31e-06						-0.158	0.000441							0.123	0.00613
	CD3E					0.111	0.0138			0.28	2.32e-10	0.402	1.37e-20					0.297	1.83e-11						-0.113	0.0122							0.145	0.00122
	CD2					0.16	0.000369			0.283	1.47e-10	0.41	2.03e-21					0.311	1.58e-12						-0.116	0.01							0.13	0.00397
B CELL	CD19	-0.173	0.000117					0.246	3.13e-08	0.279	3.07e-10	0.336	1.91e-14					0.141	0.0017
	CD79A	-0.126	0.00511					0.202	6.27e-06	0.351	9.52e-16	0.291	4.3e-11					0.164	0.000254
MONOCYTE	CD86					0.46	3.47e-27			0.538	2.35e-38	0.405	6.29e-21					0.662	1.78e-63										0.208	3.32e-06	0.219	8.69e-07	0.456	1.02e-26
	CD115 (CSF1R)					0.383	1.09e-18			0.456	9.57e-21	0.393	1.3e-19					0.675	8.69e-17										0.274	6.05e-10	0.252	1.36e-08	0.388	3.42e-19
TAM(tumor associated macrophages)	CCL2									0.361	1.23e-16	0.26	4.77e-09					0.41	2.09e-21										0.232	1.99e-07	0.158	0.000433	0.48	7.78e-30
	CD68									0.398	3.75e-20	0.313	1.23e-12					0.679	6.56e-68										0.218	9.72e-07	0.206	3.92e-06	0.355	4.12e-16
	IL10									0.346	2.51e-15	0.275	4.99e-10					0.531	3.16e-37										0.146	0.00115	0.14	0.00177	0.368	2.71e-17
M1	INOS (NOS2)					0.19	2.19e-05																										0.18	6.04e-05
	IRF5					0.16	0.000374																										0.191	2.02e-05
	COX2 (PTGS2)					0.259	5.68e-09																										0.26	4.89e-09
M2	CD163					0.471	1.36e-28			0.458	6.47e-27	0.338	1.22e-14					0.647	8.53e-60										0.175	9.5e-05	0.253	1.31e-08	0.47	1.63e-28
	VSIG4					0.37	1.8e-17			0.375	6.71e-18	0.267	1.75e-09					0.666	1.36e-64										0.187	3.06e-05	0.168	0.000182	0.363	7.78e-17
	MS4A4A					0.372	1.29e-17			0.368	2.88e-17	0.251	1.54e-08					0.681	2.3e-68										0.156	0.000505	0.213	1.75e-06	0.357	2.63e-16
NEUTROPHILS	CD66b (CEACAM8)																	0.298	1.56e-11										0.19	2.22e-05
	CD11b (ITGAM)																	0.642	1.35e-58										0.285	1.13e-10
	CCR7																	0.285	1.17e-10										0.172	0.00012
Natural killer cell	KIR2DL1									0.143	0.00151	0.236	1.15e-07
	KIR2DL3									0.187	2.83e-05	0.328	7.61e-14
	KIR2DL4									0.41	2.24e-21	0.393	1.23e-19
	KIR3DL1									0.129	0.00402	0.239	8.02e-08
	KIR3DL2									0.23	2.54e-07	0.284	1.35e-10
	KIR3DL3									0.241	5.72e-08	0.241	6.09e-08
	KIR2DS4									0.201	6.65e-06	0.213	1.85e-06
Dendritic cell	HLA-DPB1																	0.496	5.77e-32										0.257	7.18e-09	0.194	1.43e-05
	HLA-DQB1																	0.328	7.76e-14										0.219	8.68e-07	0.157	0.000465
	HLA-DRA																	0.506	2.05e-33										0.266	1.85e-09	0.203	5.76e-06
	HLA-DPA1																	0.517	4.84e-35										0.281	2.13e-10	0.27	1.13e-09
	BDCA-1 (CD1C)																	0.271	9.87e-10										0.194	1.38e-05	0.191	1.99e-05
	BDCA-4 (NRP1)																	0.241	6.01e-08										0.117	0.00912	0.242	4.98e-08
	CD11c (ITGAX)																	0.553	1.35e-37										0.185	3.75e-05	0.205	4.46e-06
TH1	T-bet (TBX21)					0.184	4.08e-05			0.247	2.71e-08	0.431	9.72e-24					0.224	5.31e-07												0.159	0.000381
	STAT4					0.193	1.6e-05			0.184	4.07e-05	0.183	4.58e-05					0.264	2.63e-09												0.246	3.17e-08
	STAT1					0.285	1.08e-10			0.397	4.42e-20	0.348	1.67e-15					0.278	3.26e-10												0.311	1.55e-12
	IFN-γ (IFNG)					0.165	0.000226			0.361	1.23e-16	0.415	5.92e-22					0.101	0.0252												0.161	0.000326
	TNF-α (TNF)					0.147	0.0011			0.207	3.77e-06	0.372	1.35e-17					0.284	1.33e-10												0.161	0.000341
TH2	GATA3															0.117	0.00944
	STAT6															0.115	0.0109
	STAT5A															0.2	7.54e-06
	IL-13															0.144	0.0013
TFH	BCL6			-0.109	0.0153	0.112	0.0131	0.232	1.93e-07					-0.112	0.0131			0.113	0.0123						0.145	0.00129			0.111	0.0141	0.262	3.7e-09
TH17	IL21									0.314	8.95e-13
	STAT3									0.115	0.0107
	IL17A									0.13	0.00375
TREG	FOXP3					0.257	6.82e-09			0.389	3.11e-19	0.427	2.6e-23					0.402	1.59e-20										0.135	0.0026			0.266	2.05e-09
	CCR8					0.351	1.02e-15			0.351	1.05e-15	0.336	1.05e-15					0.475	3.95e-29										0.149	0.000928			0.346	2.45e-15
	STAT5B					0.243	4.9e-08			0.196	1.19e-05	0.298	1.19e-05					0.371	1.53e-17										0.182	4.81e-05			0.224	5.02e-07
	TGF-β (TGFB1）					0.288	7.55e-11			0.219	9.4e-07	0.202	5.91e-06					0.421	1.19e-22										0.219	8.89e-07			0.291	4.66e-11
T CELL EXHAUSTION	PD-1(PDCD1)					0.197	1.06e-05			0.415	6.2e-22	0.525	3.05e-36					0.225	4.47e-07														0.215	1.49e-06
	CTLA-4					0.281	2.19e-10			0.388	3.75e-19	0.454	1.89e-26					0.281	2.13e-10														0.262	3.41e-09
	LAG3					0.145	0.00121			0.413	1.03e-21	0.515	9.42e-35					0.197	1.02e-05														0.144	0.00137
	TIM-3(HAVCR2)					0.404	8.67e-21			0.507	1.55e-33	0.388	3.74e-19					0.656	6.99e-62														0.4	2.26e-20
	GZMB					0.286	1.06e-10			0.491	2.65e-31	0.489	5.37e-31					0.125	0.00546														0.288	7.5e-11
cor,R value of spearman's correlation. purity,tumor purity-correlated adjustments
